# Supplementary material for: Antimony -doped indium-based halide single crystals enabling white-light emission
Source: Royal Society of Chemistry journal article supplement (doi:10.1039/d2qi01224c), 2022-01-01
Supplement: d2qi01224c1.pdf [file d2qi01224c1.pdf]

## Supporting Information

# Antimony Doping Indium-based Halide Single Crystals Enabling White-light Emission

Yue Wu,<sup>a</sup>Cui-Mi Shi,<sup>b</sup> Shi-Rong Kang<sup>a</sup> and Liang-Jin Xu,<sup>b,c\*</sup>

<sup>a</sup>School of Chemistry and Chemical Engineering, Liaocheng University, Liaocheng, Shandong,252000, China

<sup>b</sup>State Key Laboratory of Structural Chemistry, Fujian Institute of Research on the Structure of Matter, Chinese Academy of Sciences, Fuzhou, Fujian 350002, China

<sup>c</sup> Fujian Science & Technology Innovation Laboratory for Optoelectronic Information of China, Fuzhou, Fujian 350108, China

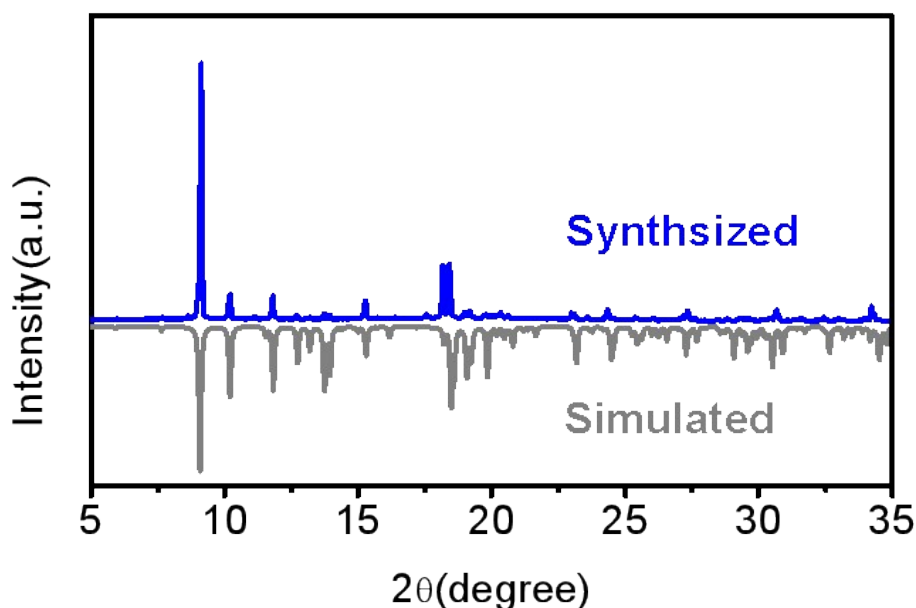

**Figure S1.** The PXRD patterns of  $(\text{TMPL})_3\text{InCl}_6 \cdot \text{EtOH}$  and corresponding simulated one from single crystal.

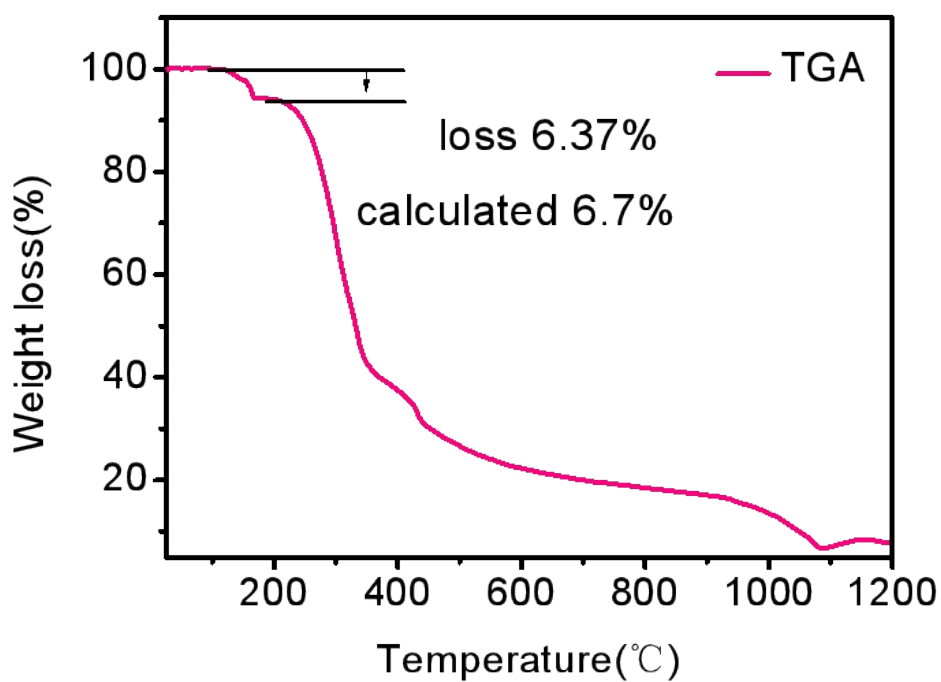

**Figure S2.** TGA curve of  $(\text{TMPL})_3\text{InCl}_6 \cdot \text{EtOH}$  in the range of 25-1200°C.(weight loss of 6.37% refers to EtOH)

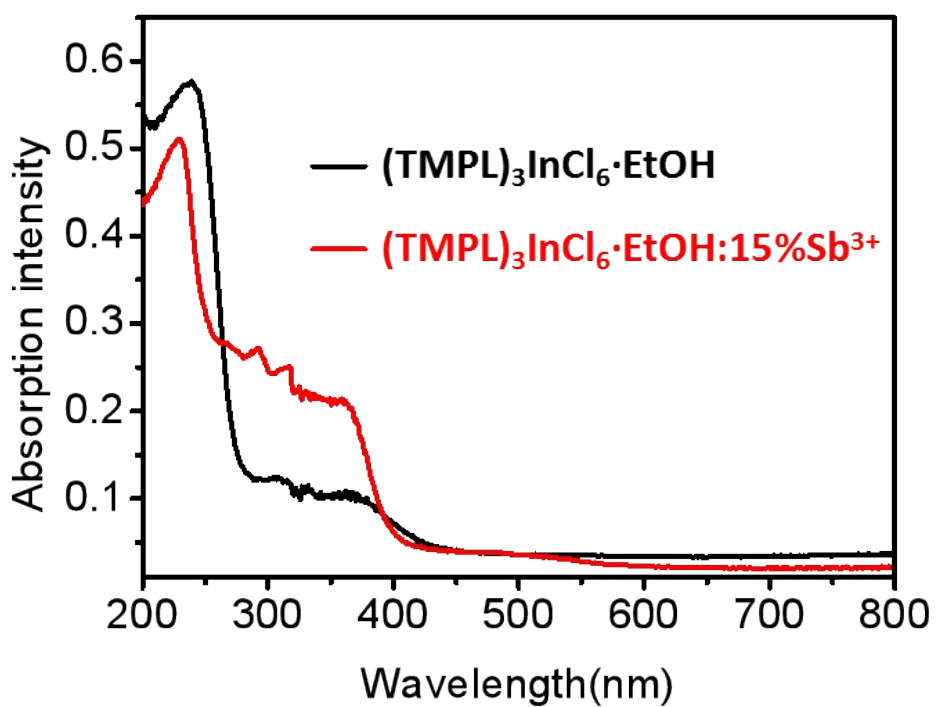

**Figure S3.** The UV-vis absorption spectra of  $(\text{TMPL})_3\text{InCl}_6 \cdot \text{EtOH}$  at room temperature.

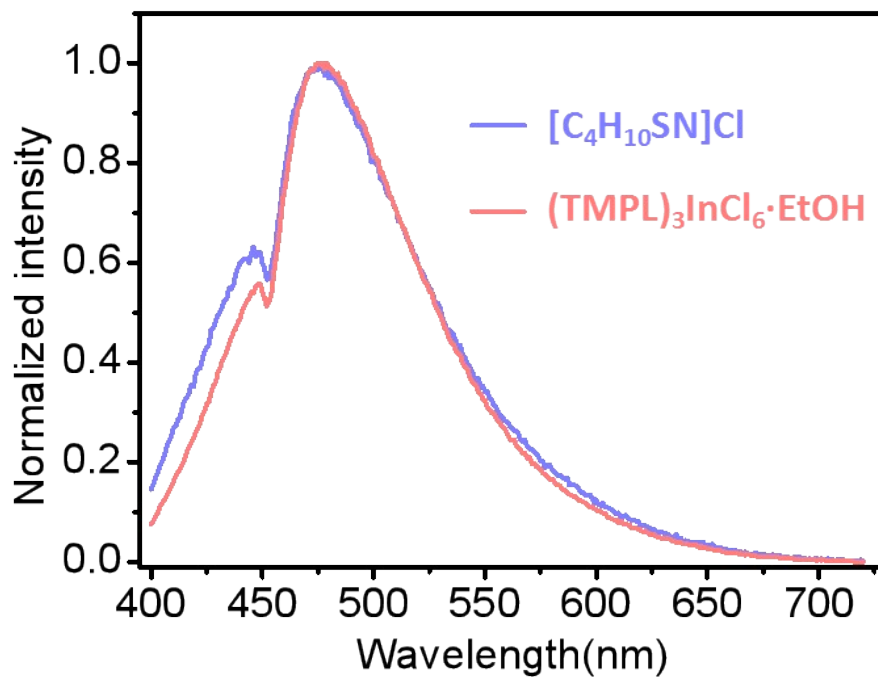

**Figure S4.** PL emission spectra of  $(\text{TMPL})_3\text{InCl}_6 \cdot \text{EtOH}$  and  $[\text{C}_4\text{H}_{10}\text{SN}]\text{Cl}$  under excited at 340 nm.

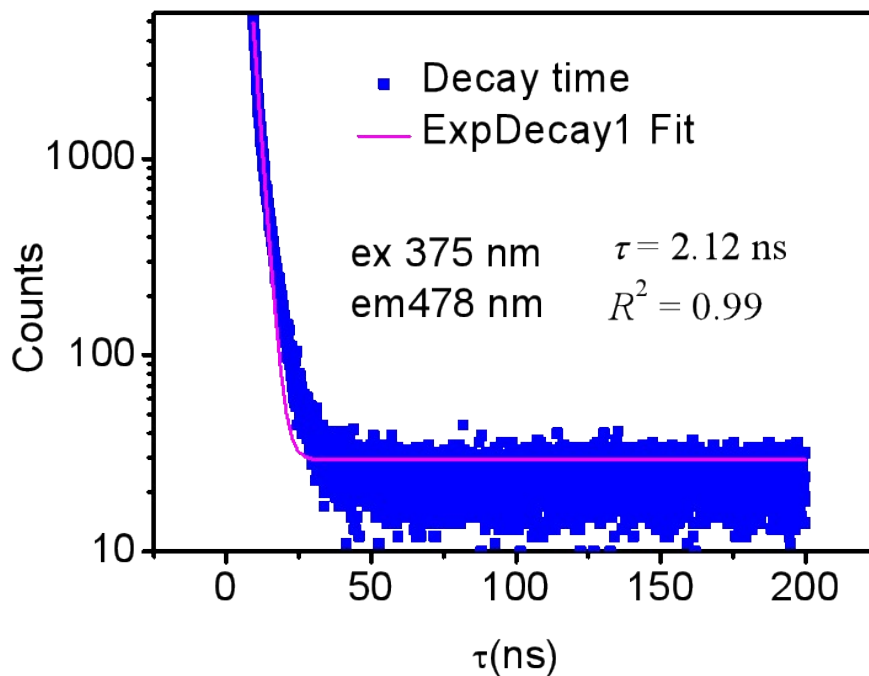

**Figure S5.** Emission decay time curve of  $[\text{C}_4\text{H}_{10}\text{SN}]\text{Cl}$  monitoring at 480 nm under excited at 375 nm.

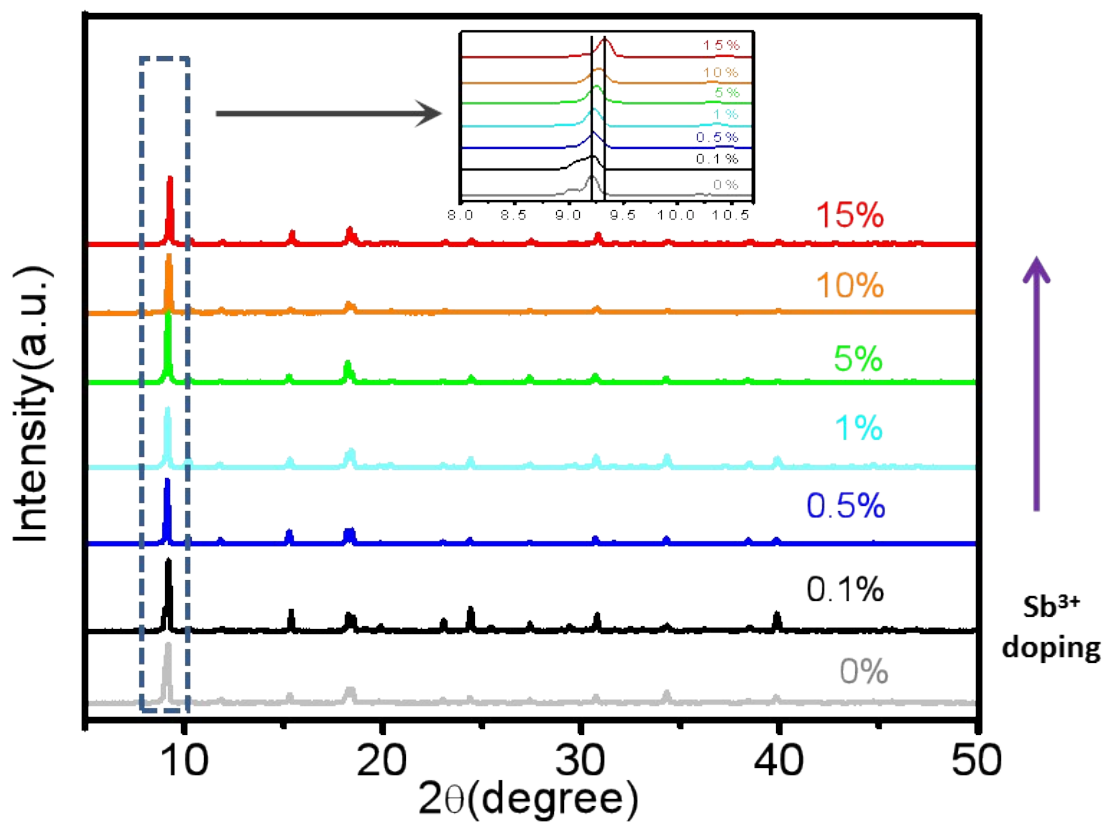

**Figure S6.** The PXRD patterns of Sb-doped  $(\text{TMPL})_3\text{InCl}_6 \cdot \text{EtOH} : x\text{Sb}$  ( $x = 0-15\%$ ).

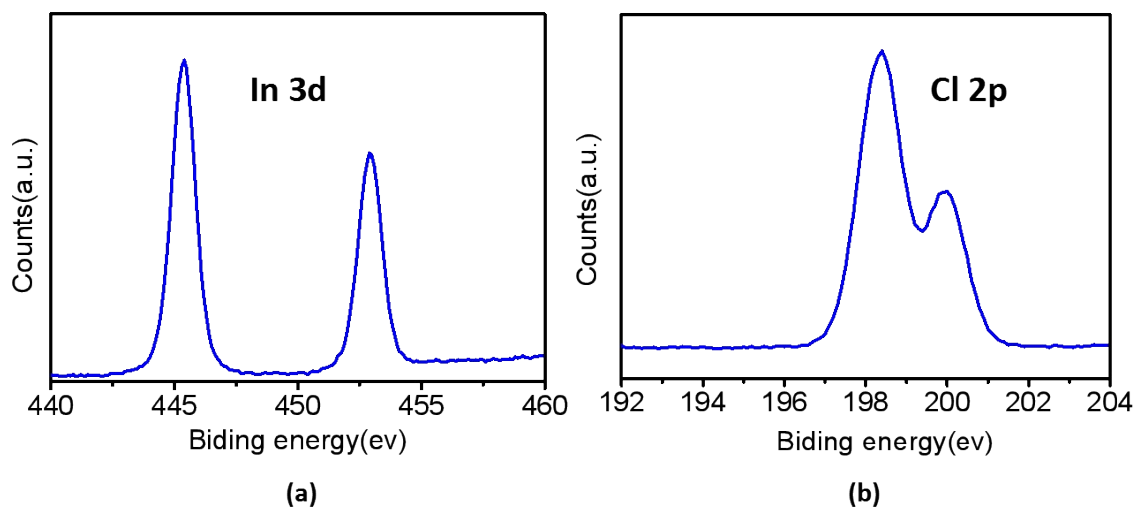

**Figure S7.** X-ray photoelectron spectroscopy (XPS) spectra in  $(\text{TMPL})_3\text{InCl}_6 \cdot \text{EtOH} : 15\% \text{Sb}$  corresponding to In 3d and Cl 2p orbitals.

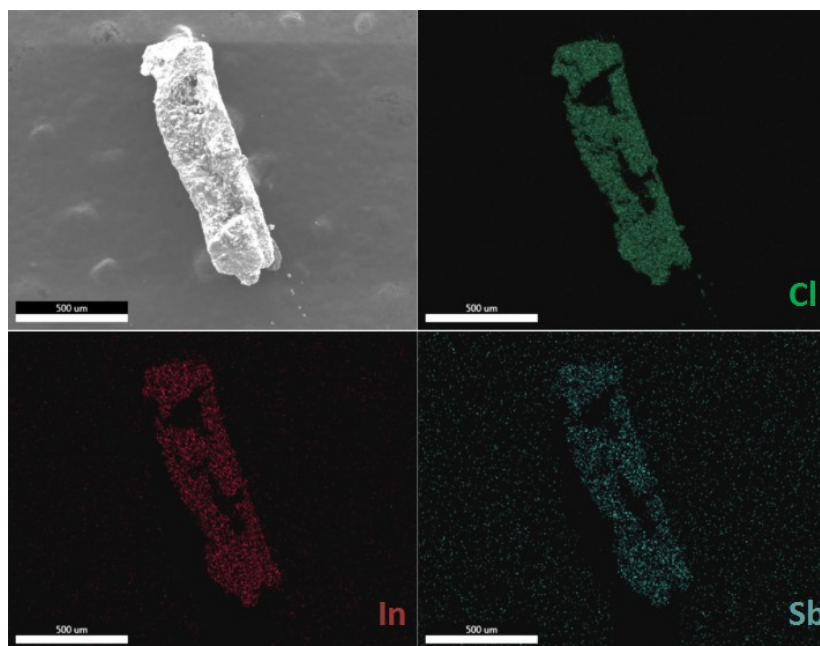

**Figure S8.** Scanning electron microscopy image (SEM) images and corresponding EDS element mapping of Cl, In, and Sb elements in  $(\text{TMPL})_3\text{InCl}_6 \cdot \text{EtOH} : 15\% \text{Sb}$  single crystal.

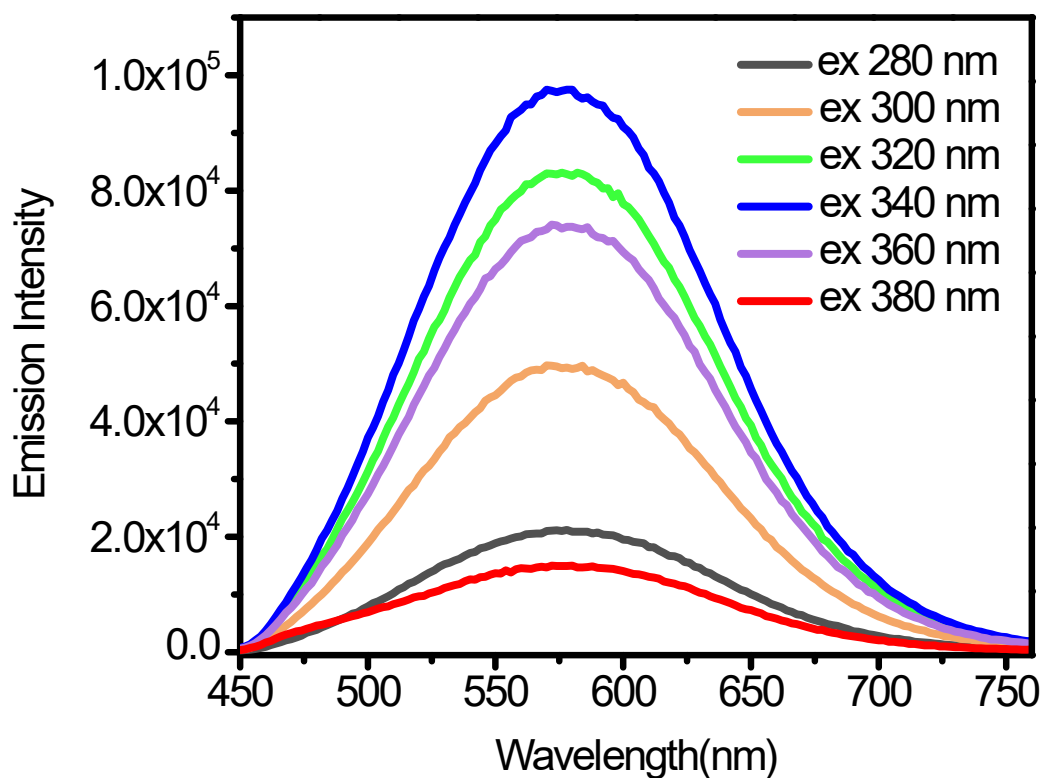

**Figure S9.** Excitation-dependent PL emission spectra of  $(\text{TMPL})_3\text{InCl}_6 \cdot \text{EtOH} : 15\% \text{Sb}$  under various excited wavelength (280-380 nm).

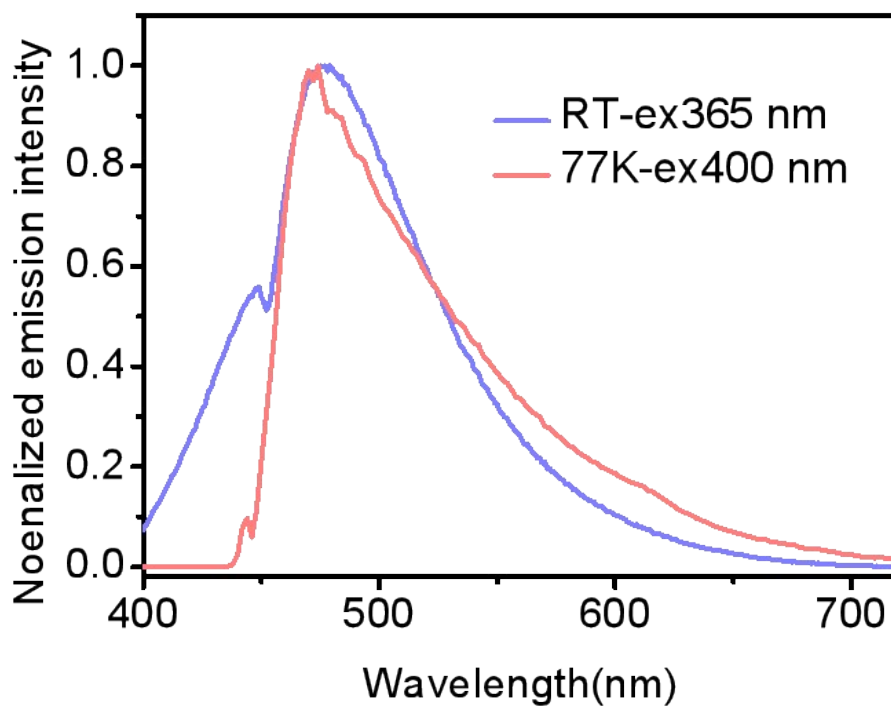

**Figure S10.** Normalized PL emission spectra of  $(\text{TMPL})_3\text{InCl}_6 \cdot \text{EtOH}$  at room temperature and low temperature (77 K).

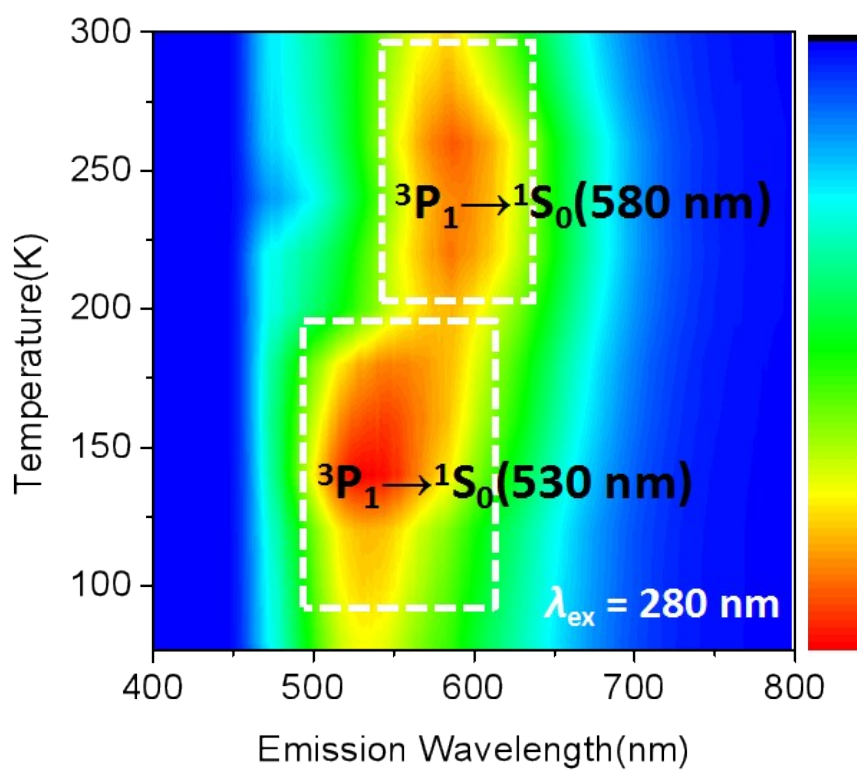

**Figure S11.** Temperature-dependent emission spectra upon excitation at 280 nm, along with temperature change from 77-300 K.

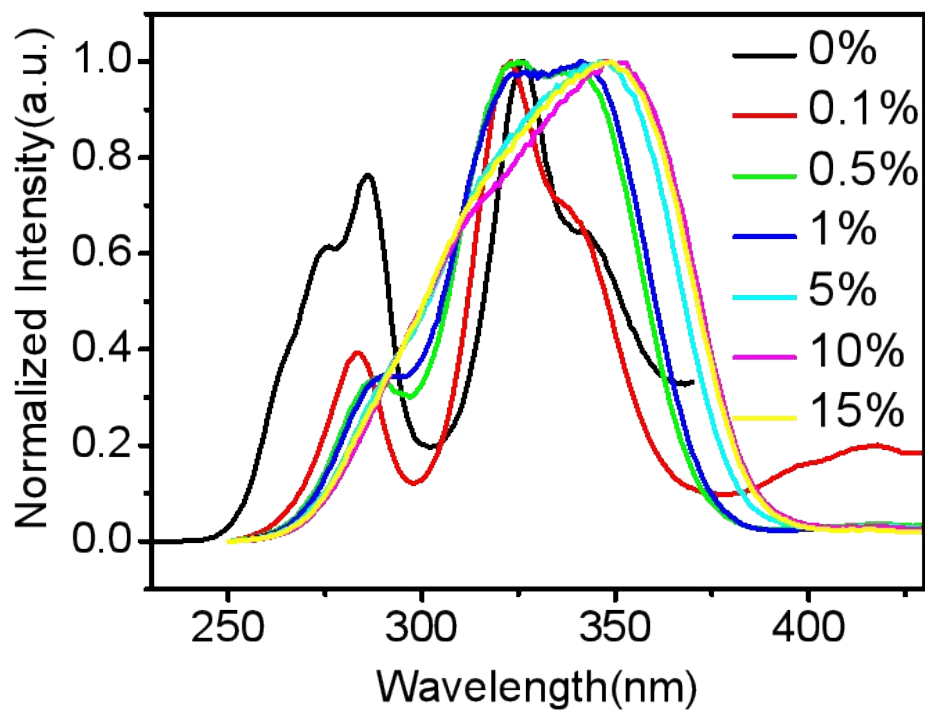

**Figure S12.** The PLE Spectra of  $(\text{TMPL})_3\text{InCl}_6 \cdot \text{EtOH} : x\text{Sb}$  ( $x = 0-15\%$ ).

**Table S1.** Single X-Ray Diffraction Crystallographic Data of (TMPL)<sub>3</sub>InCl<sub>6</sub>·EtOH.

| Compounds                                 | (TMPL) <sub>3</sub> InCl <sub>6</sub> ·EtOH                                                          |
|-------------------------------------------|------------------------------------------------------------------------------------------------------|
| Moiety formula                            | (C <sub>4</sub> H <sub>10</sub> NS) <sub>3</sub> InCl <sub>6</sub> ·C <sub>2</sub> H <sub>5</sub> OH |
| Sum formula                               | C <sub>14</sub> H <sub>36</sub> Cl <sub>6</sub> InN <sub>3</sub> OS <sub>3</sub>                     |
| Temperature/K                             | 100                                                                                                  |
| Crystal system                            | Triclinic                                                                                            |
| Space group                               | <i>P</i> -1                                                                                          |
| <i>a</i> / Å                              | 7.6775(6)                                                                                            |
| <i>b</i> / Å                              | 11.6645(8)                                                                                           |
| <i>c</i> / Å                              | 15.0912(11)                                                                                          |
| <i>α</i> / deg                            | 83.058(3)                                                                                            |
| <i>β</i> / deg                            | 87.367(3)                                                                                            |
| <i>γ</i> / deg                            | 88.759(3)                                                                                            |
| volume / Å <sup>3</sup>                   | 1339.98(17)                                                                                          |
| <i>Z</i>                                  | 2                                                                                                    |
| $\rho_{\text{calc}}$ / g·cm <sup>-3</sup> | 1.701                                                                                                |
| <i>F</i> (000)                            | 696.0                                                                                                |
| Crystal size / mm <sup>3</sup>            | 0.72 × 0.09 × 0.09                                                                                   |
| $\mu$ / mm <sup>-1</sup>                  | 1.721                                                                                                |
| Radiation                                 | Mo K $\alpha$ ( $\lambda$ = 0.71073 Å)                                                               |
| Final <i>R</i> indexes [all data]         | <i>R</i> <sub>1</sub> <sup>a</sup> =0.0518 <i>wR</i> <sub>2</sub> <sup>b</sup> =0.1474               |
| GOF                                       | 1.077                                                                                                |

$$(a) R_1 = \frac{\sum |F_o - F_c|}{\sum F_o}$$

$$(b) wR_2 = \frac{\sum [w(F_o^2 - F_c^2)]}{\sum [w(F_o^2)]}$$



**TableS2.** Selected bond angle (°) of (TMPL)<sub>3</sub>InCl<sub>6</sub>·EtOH.

| Atom1 | Atom2 | Atom3 | Bond angle |
|-------|-------|-------|------------|
| C12   | In1   | C11   | 90.89      |
| C12   | In1   | C13   | 91.88      |
| C12   | In1   | C11   | 89.11      |
| C12   | In1   | C13   | 88.12      |
| C11   | In1   | C13   | 89.92      |
| C11   | In1   | C13   | 90.08      |
| C13   | In1   | C11   | 89.92      |
| C11   | In1   | C13   | 90.08      |
| C11   | In1   | C12   | 89.11      |
| C12   | In1   | C13   | 88.12      |
| C12   | In1   | C13   | 91.88      |
| C12   | In1   | C11   | 90.89      |
| C16   | In2   | C14   | 90.56      |
| C16   | In2   | C15   | 92.68      |
| C16   | In2   | C14   | 89.44      |
| C16   | In2   | C15   | 87.32      |
| C15   | In2   | C14   | 91.41      |
| C15   | In2   | C14   | 88.59      |
| C14   | In2   | C15   | 91.41      |
| C15   | In2   | C14   | 88.59      |
| C14   | In2   | C16   | 90.56      |
| C15   | In2   | C16   | 87.32      |
| C16   | In2   | C14   | 89.44      |
| C16   | In2   | C15   | 92.68      |

**Table S3.** Selected bond length (Å) of (TMPL)<sub>3</sub>InCl<sub>6</sub>·EtOH.

| Atom1 | Atom2 | Bond length |
|-------|-------|-------------|
| C11   | In1   | 2.505       |
| C13   | In1   | 2.523       |
| C12   | In1   | 2.540       |
| C11   | In1   | 2.505       |
| C13   | In1   | 2.523       |
| C12   | In1   | 2.540       |
| C14   | In2   | 2.532       |
| C16   | In2   | 2.520       |
| In2   | C15   | 2.516       |
| In2   | C16   | 2.520       |
| In2   | C14   | 2.532       |
| In2   | C15   | 2.516       |

**Table S4.** Photophysical parameter of (TMPL)<sub>3</sub>InCl<sub>6</sub>·EtOH and (TMPL)<sub>3</sub>InCl<sub>6</sub>·EtOH:15%Sb.

|                      | (TMPL) <sub>3</sub> InCl <sub>6</sub> ·EtOH | (TMPL) <sub>3</sub> InCl <sub>6</sub> ·EtOH:15%Sb |
|----------------------|---------------------------------------------|---------------------------------------------------|
| $\lambda_{em}^a$ /nm | 478                                         | 580                                               |
| $\tau^b$ /μs         | $2.95 \times 10^{-3}$                       | 2.18                                              |
| $\Phi_{em}^c$ /%     | 1.73                                        | 85.35                                             |

<sup>a,c</sup> Excitation at 350 nm. <sup>b</sup> Excitation at 375 nm with EPL-375 picosecond pulsed diode laser.
